# Supplementary material for: Twitter and Facebook posts about COVID-19 are less likely to spread misinformation compared to other health topics
Source: PubMed Central journal article supplement (PMC8754324; doi:10.1371/journal.pone.0261768), 2022-01-12
Supplement: pone.0261768.s003.pdf [file pone.0261768.s003.pdf]

## Categorizing tweets with multiple URLs

Several tweets contained multiple URLs

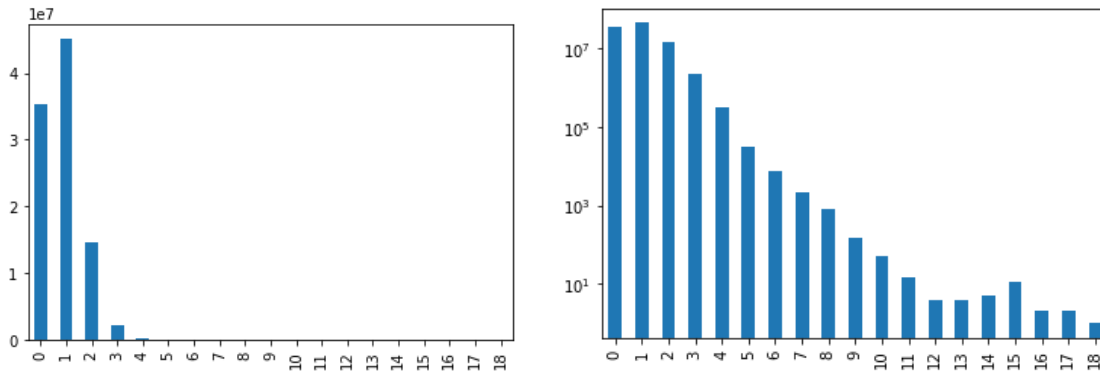

Distribution of URLs per tweet for original tweets in the COVID-19 Twitter dataset. Data are shown using linear (left) and logarithmic (right) scales.

These tweets were categorized in the following order of priority:

1. Not credible
2. Less Credible
3. Government Website
4. Academic
5. Other More Credible
