# Supplementary material for: Twitter and Facebook posts about COVID-19 are less likely to spread misinformation compared to other health topics
Source: PubMed Central journal article supplement (PMC8754324; doi:10.1371/journal.pone.0261768), 2022-01-12

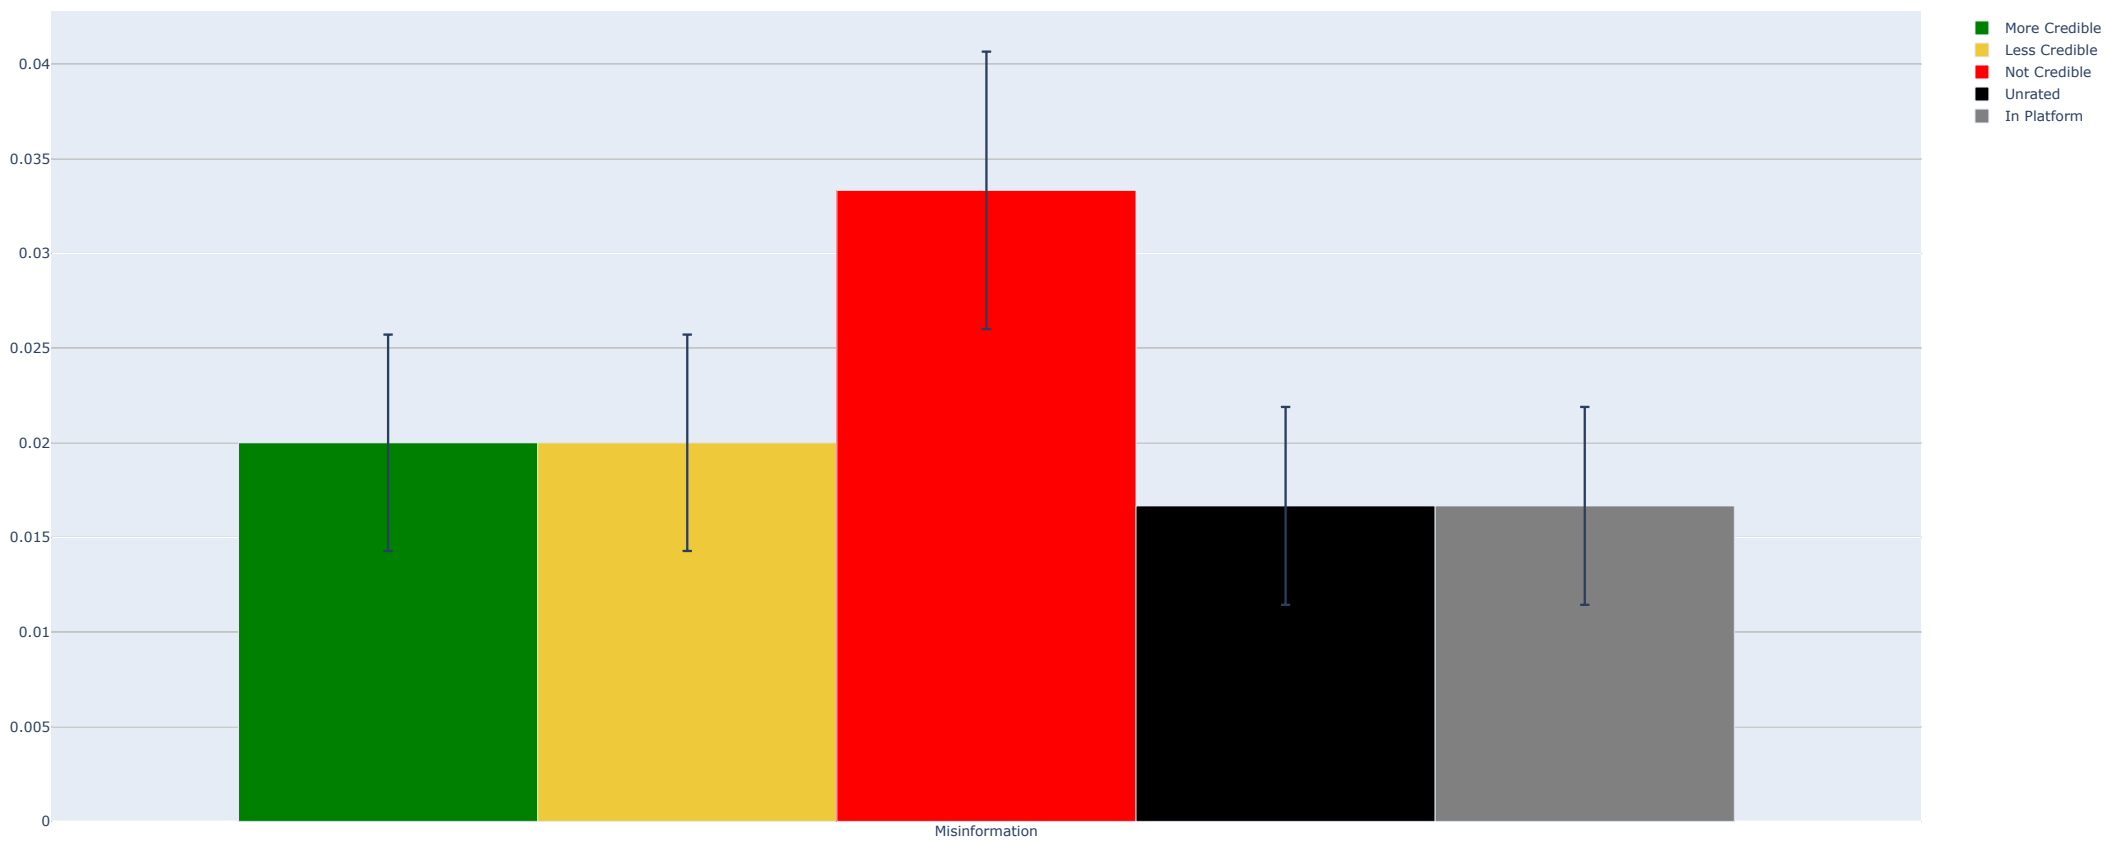

Supplement: pone.0261768.s006.pdf [file pone.0261768.s006.pdf]
