# Supplementary material for: Twitter and Facebook posts about COVID-19 are less likely to spread misinformation compared to other health topics
Source: PLOS journal article supplement (doi:10.1371/journal.pone.0261768), 2022-01-12

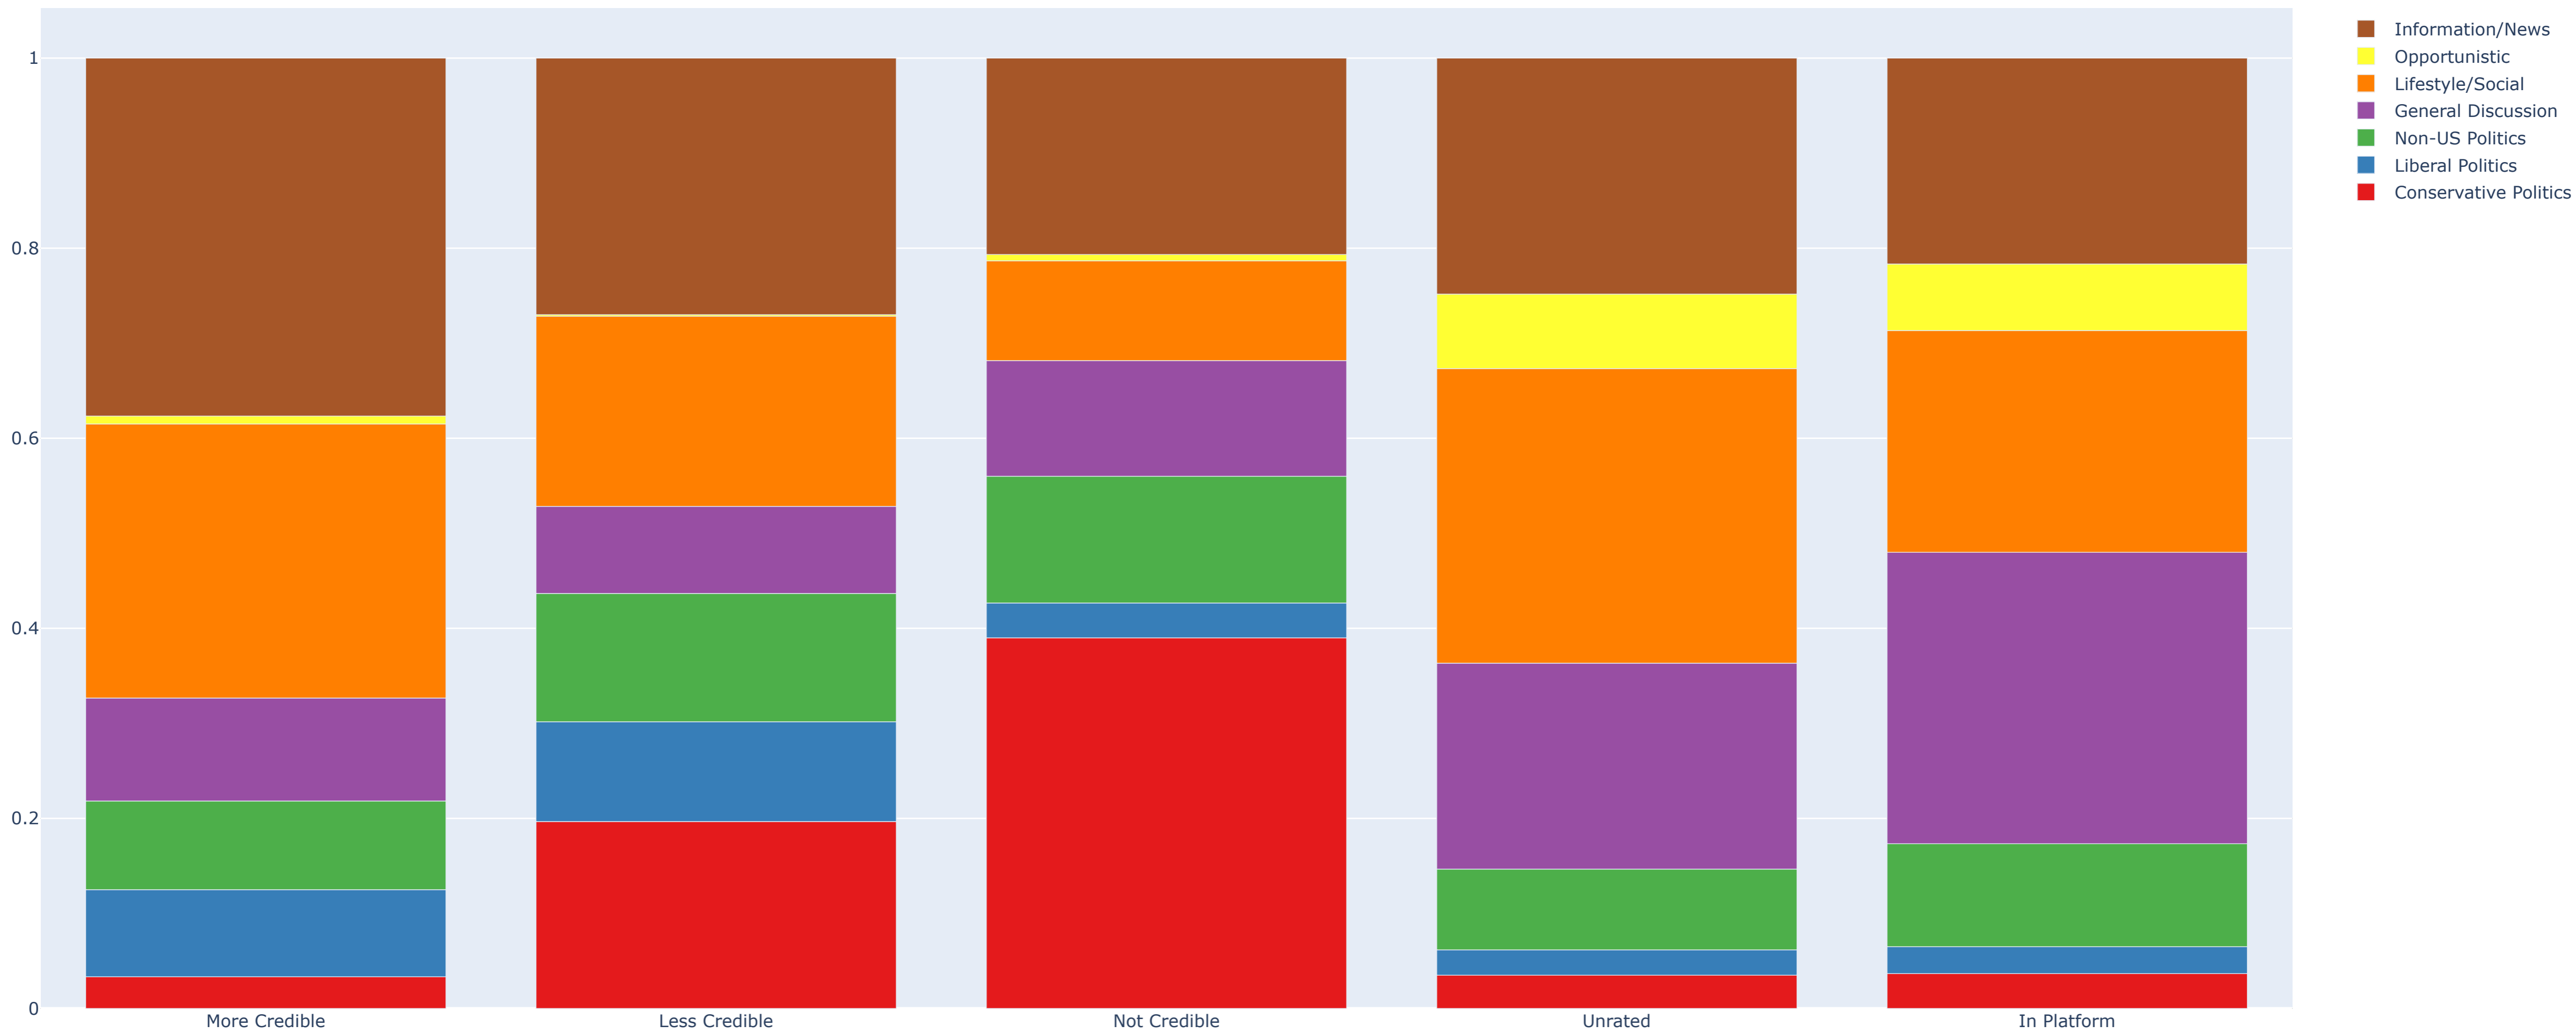

Supplement: S5 (10.1371/journal.pone.0261768.s005) [file journal.pone.0261768.s005]
